# Supplementary material for: Reduced SKP1 and CUL1 expression underlies increases in Cyclin E1 and chromosome instability in cellular precursors of high-grade serous ovarian cancer
Source: PubMed Central journal article supplement (PMC8110794; doi:10.1038/s41416-021-01317-w), 2021-03-17
Supplement: 41416_2021_1317_MOESM1_ESM.pdf [file 41416_2021_1317_MOESM1_ESM.pdf]

SUPPLEMENTARY INFORMATION

SUPPLEMENTARY TABLES

**Table S I. List of Antibodies Employed for Western Blot Analyses.**

| <b>Target Protein<sup>A</sup></b> | <b>Species</b> | <b>Company</b>         | <b>Catalog Number</b> | <b>Working Dilution</b> |
|-----------------------------------|----------------|------------------------|-----------------------|-------------------------|
| $\alpha$ -Tubulin                 | Mouse          | Abcam                  | ab7291                | 1:20,000                |
| CCNE1                             | Rabbit         | Abcam                  | ab33911               | 1:1,000                 |
| CUL1                              | Rabbit         | Abcam                  | ab75812               | 1:1,000                 |
| Cyclophilin B                     | Rabbit         | Abcam                  | ab16045               | 1:50,000                |
| SKP1                              | Rabbit         | Abcam                  | ab76502               | 1:2,000                 |
| Anti-Rabbit HRP                   | Goat           | Jackson ImmunoResearch | 111-035-144           | 1:15,000                |
| Anti-Mouse HRP                    | Goat           | Jackson ImmunoResearch | 115-035-146           | 1:10,000                |

<sup>A</sup>HRP (Horseradish peroxidase)

**Table S II. K-S Tests Identify Significant Changes in Nuclear Area Cumulative Distribution Frequencies Following *SKP1* Silencing in FT194 Cells.**

| <b>Condition</b> | <b>n<sup>A</sup></b> | <b><i>p</i>-value<sup>B</sup></b> | <b>Significance<sup>C</sup></b> | <b>D-statistic<sup>D</sup></b> |
|------------------|----------------------|-----------------------------------|---------------------------------|--------------------------------|
| Untransfected    | 300                  | 0.0812                            | ns                              | 0.1033                         |
| siControl        | 300                  | N/A                               | N/A                             | N/A                            |
| siSKP1-1         | 300                  | < 0.0001                          | ****                            | 0.2633                         |
| siSKP1-2         | 300                  | < 0.0001                          | ****                            | 0.2600                         |
| siSKP1-Pool      | 300                  | < 0.0001                          | ****                            | 0.2067                         |
| siCUL1-3         | 300                  | < 0.0001                          | ****                            | 0.2600                         |
| siCUL1-4         | 300                  | 0.0209                            | *                               | 0.1233                         |
| siCUL1-Pool      | 300                  | 0.2099                            | ns                              | 0.0867                         |

<sup>A</sup>Number of nuclei analyzed.

<sup>B</sup>*p*-values calculated from two-sample K-S tests for the listed condition relative to siControl. N/A, not applicable.

<sup>C</sup>Significance (ns, not significant; \*, *p*-value < 0.05; \*\*\*\*, *p*-value < 0.0001).

<sup>D</sup>D-statistic (maximum deviation between the two distribution curves).

**Table S III. M-W Tests Identify Significant Increases in MN Formation Following *SKP1* or *CUL1* Silencing in FT194 Cells.**

| Condition     | n <sup>A</sup> | Mean Nucleus Count <sup>B</sup> | Mean MN Count <sup>C</sup> | Mean MN Formation (%) <sup>D</sup> | Fold Change in MN Formation <sup>E</sup> | <i>p</i> -value <sup>F</sup> |
|---------------|----------------|---------------------------------|----------------------------|------------------------------------|------------------------------------------|------------------------------|
| Untransfected | 6              | 1605                            | 169                        | 10.57                              | 1.07                                     | 0.3095                       |
| siControl     | 6              | 1583                            | 153                        | 9.61                               | 0.97                                     | N/A                          |
| siSKP1-1      | 6              | 1004                            | 182                        | 18.80                              | 1.89                                     | 0.0022                       |
| siSKP1-2      | 6              | 1147                            | 218                        | 20.70                              | 1.80                                     | 0.0022                       |
| siSKP1-Pool   | 6              | 885                             | 154                        | 18.65                              | 1.86                                     | 0.0022                       |
| siCUL1-3      | 6              | 1280                            | 197                        | 15.60                              | 1.58                                     | 0.0022                       |
| siCUL1-4      | 6              | 1518                            | 151                        | 10.00                              | 1.03                                     | 0.2403                       |
| siCUL1-Pool   | 6              | 1507                            | 203                        | 13.48                              | 1.30                                     | 0.0087                       |

<sup>A</sup>Number of wells analyzed.

<sup>B</sup>Mean number of nuclei analyzed per well.

<sup>C</sup>Mean number of micronuclei counted per well.

<sup>D</sup>Mean percent MN formation (calculated for each well as the MN count/nucleus count × 100).

<sup>E</sup>Median fold change in MN formation relative to siControl at the corresponding timepoint.

<sup>F</sup>*p*-values calculated from two-sample M-W tests for the listed condition relative to siControl at the corresponding timepoint. N/A, not applicable.

**Table S IV. K-S Tests Identify Significant Changes in Nuclear Area Cumulative Frequency Distributions Following *SKP1* Silencing in FT246 Cells.**

| <b>Condition</b> | <b>n<sup>A</sup></b> | <b><i>p</i>-value<sup>B</sup></b> | <b>Significance<sup>C</sup></b> | <b>D-statistic<sup>D</sup></b> |
|------------------|----------------------|-----------------------------------|---------------------------------|--------------------------------|
| Untransfected    | 300                  | 0.2485                            | ns                              | 0.0833                         |
| siControl        | 300                  | N/A                               | N/A                             | N/A                            |
| siSKP1-1         | 300                  | < 0.0001                          | ****                            | 0.3767                         |
| siSKP1-2         | 300                  | < 0.0001                          | ****                            | 0.2414                         |
| siSKP1-Pool      | 300                  | < 0.0001                          | ****                            | 0.3833                         |
| siCUL1-3         | 300                  | 0.0005                            | ***                             | 0.1667                         |
| siCUL1-4         | 300                  | 0.0659                            | ns                              | 0.2076                         |
| siCUL1-Pool      | 300                  | 0.0002                            | ***                             | 0.1733                         |

<sup>A</sup>Number of nuclei analyzed.

<sup>B</sup>*p*-values calculated from two-sample K-S tests for the listed condition relative to siControl. N/A, not applicable.

<sup>C</sup>Significance (ns, not significant; \*\*\*, *p*-value < 0.001; \*\*\*\*, *p*-value < 0.0001).

<sup>D</sup>D-statistic (maximum deviation between the two distribution curves).

**S V. M-W Tests Identify Significant Increases in MN Formation Following *SKP1* or *CUL1* Silencing in FT246 Cells.**

| Condition     | n <sup>A</sup> | Mean Nucleus Count <sup>B</sup> | Mean MN Count <sup>C</sup> | Mean MN Formation (%) <sup>D</sup> | Fold Change in MN Formation <sup>E</sup> | <i>p</i> -value <sup>F</sup> |
|---------------|----------------|---------------------------------|----------------------------|------------------------------------|------------------------------------------|------------------------------|
| Untransfected | 6              | 516                             | 11                         | 2.11                               | 0.93                                     | 0.8182                       |
| siControl     | 6              | 604                             | 14                         | 2.28                               | 0.99                                     | N/A                          |
| siSKP1-1      | 6              | 165                             | 18                         | 10.64                              | 4.08                                     | 0.0022                       |
| siSKP1-2      | 6              | 268                             | 21                         | 7.96                               | 3.94                                     | 0.0260                       |
| siSKP1-Pool   | 6              | 180                             | 16                         | 8.45                               | 3.98                                     | 0.0022                       |
| siCUL1-3      | 6              | 436                             | 31                         | 7.10                               | 3.05                                     | 0.0022                       |
| siCUL1-4      | 6              | 557                             | 18                         | 3.26                               | 1.30                                     | 0.1797                       |
| siCUL1-Pool   | 6              | 538                             | 33                         | 6.09                               | 2.77                                     | 0.0043                       |

<sup>A</sup>Number of wells analyzed.

<sup>B</sup>Mean number of nuclei analyzed per well.

<sup>C</sup>Mean number of micronuclei counted per well.

<sup>D</sup>Mean percent MN formation (calculated for each well as the MN count/nucleus count × 100).

<sup>E</sup>Median fold change in MN formation relative to siControl at the corresponding timepoint.

<sup>F</sup>*p*-values calculated from two-sample M-W tests for the listed condition relative to siControl at the corresponding timepoint. N/A, not applicable.

**Table S VI: Co-silencing *SKP1* and *CCNE1* reduces micronucleus formation<sup>A</sup>.**

|                      | <b>siControl</b> | <b>siCCNE1</b> | <b>siSKP1</b> | <b>siSKP1 +<br/>siCCNE1</b> |
|----------------------|------------------|----------------|---------------|-----------------------------|
| <b>Untransfected</b> | 0.9989           | 0.9907         | 0.0031        | 0.6147                      |
| <b>siControl</b>     |                  | 0.9518         | 0.0016        | 0.4585                      |
| <b>siCCNE1</b>       |                  |                | 0.0093        | 0.8631                      |
| <b>siSKP1</b>        |                  |                |               | 0.0842                      |

<sup>A</sup>Tukey multi-comparison post-tests

**Table S VII: Co-silencing *CUL1* and *CCNE1* reduces micronucleus formation<sup>A</sup>.**

|                      | <b>siControl</b> | <b>siCCNE1</b> | <b>siCUL1</b> | <b>siCUL1 +<br/>siCCNE1</b> |
|----------------------|------------------|----------------|---------------|-----------------------------|
| <b>Untransfected</b> | 0.9993           | 0.9939         | <0.0001       | 0.0009                      |
| <b>siControl</b>     |                  | 0.9673         | <0.0001       | 0.0005                      |
| <b>siCCNE1</b>       |                  |                | 0.0001        | 0.0026                      |
| <b>siCUL1</b>        |                  |                |               | 0.7609                      |

<sup>A</sup>Tukey multi-comparison post-tests

**Table S VIII. K-S Tests Identify Significant Changes in Cumulative Chromosome Number Frequency Distributions Following *SKP1* or *CUL1* Silencing in FT194 Cells.**

| <b>Condition</b> | <b>n<sup>A</sup></b> | <b><i>p</i>-value<sup>B</sup></b> | <b>Significance<sup>C</sup></b> | <b>D-statistic<sup>D</sup></b> |
|------------------|----------------------|-----------------------------------|---------------------------------|--------------------------------|
| Untransfected    | 100                  | 0.7736                            | ns                              | 0.0900                         |
| siControl        | 100                  | N/A                               | N/A                             | N/A                            |
| siSKP1-1         | 100                  | 0.0327                            | *                               | 0.2076                         |
| siSKP1-2         | 100                  | 0.0023                            | **                              | 0.2620                         |
| siSKP1-Pool      | 100                  | < 0.0001                          | ****                            | 0.4284                         |
| siCUL1-3         | 100                  | < 0.0001                          | ****                            | 0.1417                         |
| siCUL1-4         | 100                  | 0.0002                            | ***                             | 0.3090                         |
| siCUL1-Pool      | 100                  | < 0.0001                          | ****                            | 0.3552                         |

<sup>A</sup>Number of mitotic spreads analyzed.

<sup>B</sup>*p*-values calculated from two-sample K-S tests for the listed condition vs. siControl. N/A, not applicable.

<sup>C</sup>Significance (ns, not significant; \*, *p*-value < 0.05; \*\*, *p*-value < 0.01; \*\*\*, *p*-value < 0.001; \*\*\*\*, *p*-value < 0.0001).

<sup>D</sup>D-statistic (maximum deviation between the two distribution curves).



**Table S IX. Statistical Assessment of Chromosome Number Distributions Following *SKP1* or *CUL1* Silencing in FT246 Cells.**

| <b>Condition</b> | <b>n<sup>A</sup></b> | <b><i>p</i>-value<sup>B</sup></b> | <b>Significance<sup>C</sup></b> | <b>D-statistic<sup>D</sup></b> |
|------------------|----------------------|-----------------------------------|---------------------------------|--------------------------------|
| Untransfected    | 100                  | 0.8127                            | ns                              | 0.0900                         |
| siControl        | 100                  | N/A                               | N/A                             | N/A                            |
| siSKP1-1         | 100                  | 0.1644                            | ns                              | 0.1593                         |
| siSKP1-2         | 100                  | 0.1069                            | ns                              | 0.1729                         |
| siSKP1-Pool      | 100                  | 0.3001                            | ns                              | 0.1387                         |
| siCUL1-3         | 100                  | 0.2793                            | ns                              | 0.1417                         |
| siCUL1-4         | 100                  | 0.1790                            | ns                              | 0.1561                         |
| siCUL1-Pool      | 100                  | 0.0171                            | *                               | 0.2176                         |

<sup>A</sup>Number of mitotic spreads analyzed.

<sup>B</sup>*p*-values calculated from two-sample K-S tests for the listed condition vs. siControl. N/A, not applicable.

<sup>C</sup>Significance (ns, not significant; \*, *p*-value < 0.05).

<sup>D</sup>D-statistic (maximum deviation between the two distribution curves).

**Table S X. Statistical Assessment of Nuclear Area Cumulative Distribution Frequencies in *SKPI*<sup>+/-</sup> FT246 Clones Over Time.**

| Passage | Clone                        | n <sup>A</sup> | <i>p</i> -value <sup>B</sup> | Significance <sup>C</sup> | D-statistic <sup>D</sup> |
|---------|------------------------------|----------------|------------------------------|---------------------------|--------------------------|
| p0      | Control                      | 1200           | N/A                          | N/A                       | N/A                      |
|         | <i>SKPI</i> <sup>+/-</sup> 1 | 1200           | < 0.0001                     | ****                      | 0.4467                   |
|         | <i>SKPI</i> <sup>+/-</sup> 2 | 1200           | < 0.0001                     | ****                      | 0.3850                   |
| p4      | Control                      | 1200           | N/A                          | N/A                       | N/A                      |
|         | <i>SKPI</i> <sup>+/-</sup> 1 | 1200           | < 0.0001                     | ****                      | 0.4025                   |
|         | <i>SKPI</i> <sup>+/-</sup> 2 | 1200           | < 0.0001                     | ****                      | 0.2650                   |
| p8      | Control                      | 1200           | N/A                          | N/A                       | N/A                      |
|         | <i>SKPI</i> <sup>+/-</sup> 1 | 1200           | < 0.0001                     | ****                      | 0.3667                   |
|         | <i>SKPI</i> <sup>+/-</sup> 2 | 1200           | < 0.0001                     | ****                      | 0.2725                   |
| p12     | Control                      | 1200           | N/A                          | N/A                       | N/A                      |
|         | <i>SKPI</i> <sup>+/-</sup> 1 | 1200           | < 0.0001                     | ****                      | 0.3933                   |
|         | <i>SKPI</i> <sup>+/-</sup> 2 | 1200           | < 0.0001                     | ****                      | 0.2050                   |
| p16     | Control                      | 1200           | N/A                          | N/A                       | N/A                      |
|         | <i>SKPI</i> <sup>+/-</sup> 1 | 1200           | < 0.0001                     | ****                      | 0.3525                   |
|         | <i>SKPI</i> <sup>+/-</sup> 2 | 1200           | < 0.0001                     | ****                      | 0.1050                   |

<sup>A</sup>Number of nuclei analyzed.

<sup>B</sup>*p*-values calculated from two-sample K-S tests for the listed condition relative to siControl at the corresponding timepoint. N/A, not applicable.

<sup>C</sup>Significance (\*\*\*\*, *p*-value < 0.0001).

<sup>D</sup>D-statistic (maximum deviation between the two distribution curves).

**Table S XI. Statistical Assessment of MN Formation in *SKP1*<sup>+/-</sup> FT246 Clones Over Time.**

| Passage | Clone                        | n <sup>A</sup> | Mean Nucleus Count <sup>B</sup> | Mean MN Count <sup>C</sup> | Mean MN Formation (%) <sup>D</sup> | Fold Change in MN Formation <sup>E</sup> | <i>p</i> -value <sup>F</sup> |
|---------|------------------------------|----------------|---------------------------------|----------------------------|------------------------------------|------------------------------------------|------------------------------|
| p0      | Control                      | 12             | 737                             | 22                         | 2.95                               | 1.00                                     | N/A                          |
|         | <i>SKP1</i> <sup>+/-</sup> 1 | 12             | 1124                            | 21                         | 1.85                               | 0.60                                     | 0.0007                       |
|         | <i>SKP1</i> <sup>+/-</sup> 2 | 12             | 503                             | 42                         | 8.34                               | 2.86                                     | < 0.0001                     |
| p4      | Control                      | 12             | 405                             | 14                         | 3.51                               | 1.01                                     | N/A                          |
|         | <i>SKP1</i> <sup>+/-</sup> 1 | 12             | 731                             | 12                         | 1.58                               | 0.50                                     | < 0.0001                     |
|         | <i>SKP1</i> <sup>+/-</sup> 2 | 12             | 498                             | 26                         | 5.26                               | 1.61                                     | 0.0014                       |
| p8      | Control                      | 12             | 617                             | 26                         | 4.30                               | 0.93                                     | N/A                          |
|         | <i>SKP1</i> <sup>+/-</sup> 1 | 12             | 515                             | 8                          | 1.49                               | 0.34                                     | 0.0002                       |
|         | <i>SKP1</i> <sup>+/-</sup> 2 | 12             | 597                             | 44                         | 7.44                               | 1.65                                     | 0.0023                       |
| p12     | Control                      | 12             | 618                             | 29                         | 4.72                               | 0.89                                     | N/A                          |
|         | <i>SKP1</i> <sup>+/-</sup> 1 | 12             | 438                             | 9                          | 1.99                               | 0.47                                     | < 0.0001                     |
|         | <i>SKP1</i> <sup>+/-</sup> 2 | 12             | 506                             | 40                         | 7.89                               | 1.65                                     | < 0.0001                     |
| p16     | Control                      | 12             | 428                             | 17                         | 3.97                               | 0.94                                     | N/A                          |
|         | <i>SKP1</i> <sup>+/-</sup> 1 | 12             | 517                             | 7                          | 1.42                               | 0.31                                     | < 0.0001                     |
|         | <i>SKP1</i> <sup>+/-</sup> 2 | 12             | 478                             | 28                         | 5.89                               | 1.50                                     | 0.0068                       |

<sup>A</sup>Number of wells analyzed.

<sup>B</sup>Mean number of nuclei analyzed per well.

<sup>C</sup>Mean number of micronuclei enumerated per well.

<sup>D</sup>Mean percent MN formation (calculated for each well as the MN count/Nucleus count × 100).

<sup>E</sup>Median fold change in MN formation relative to siControl at the corresponding timepoint.

<sup>F</sup>*p*-values calculated from two-sample M-W tests for the listed condition relative to siControl at the corresponding timepoint. N/A, not applicable.

**Table S XII. Statistically Significant Changes in Cumulative Chromosome Number Frequency Distributions in *SKP1*<sup>+/-</sup> FT246 Clones Over Time.**

| Passage | Clone                        | n <sup>A</sup> | <i>p</i> -value <sup>B</sup> | Significance <sup>C</sup> | D-statistic <sup>D</sup> |
|---------|------------------------------|----------------|------------------------------|---------------------------|--------------------------|
| p0      | Control                      | 100            | N/A                          | N/A                       | N/A                      |
|         | <i>SKP1</i> <sup>+/-</sup> 1 | 100            | < 0.0001                     | ****                      | 0.8292                   |
|         | <i>SKP1</i> <sup>+/-</sup> 2 | 100            | 0.0008                       | ***                       | 0.2841                   |
| p4      | Control                      | 100            | N/A                          | N/A                       | N/A                      |
|         | <i>SKP1</i> <sup>+/-</sup> 1 | 100            | < 0.0001                     | ****                      | 0.8869                   |
|         | <i>SKP1</i> <sup>+/-</sup> 2 | 100            | 0.0048                       | **                        | 0.2486                   |
| p8      | Control                      | 100            | N/A                          | N/A                       | N/A                      |
|         | <i>SKP1</i> <sup>+/-</sup> 1 | 100            | < 0.0001                     | ****                      | 0.8900                   |
|         | <i>SKP1</i> <sup>+/-</sup> 2 | 100            | < 0.0001                     | ****                      | 0.4054                   |
| p12     | Control                      | 100            | N/A                          | N/A                       | N/A                      |
|         | <i>SKP1</i> <sup>+/-</sup> 1 | 100            | < 0.0001                     | ****                      | 0.7800                   |
|         | <i>SKP1</i> <sup>+/-</sup> 2 | 100            | 0.0001                       | ***                       | 0.3100                   |
| p16     | Control                      | 100            | N/A                          | N/A                       | N/A                      |
|         | <i>SKP1</i> <sup>+/-</sup> 1 | 100            | < 0.0001                     | ****                      | 0.6785                   |
|         | <i>SKP1</i> <sup>+/-</sup> 2 | 100            | 0.0415                       | *                         | 0.1984                   |

<sup>A</sup>Number of mitotic spreads analyzed.

<sup>B</sup>*p*-values calculated from two-sample K-S tests for the listed condition relative to siControl at the corresponding timepoint. N/A, not applicable.

<sup>C</sup>Significance (\*, *p*-value < 0.05; \*\*, *p*-value < 0.01; \*\*\*, *p*-value < 0.001; \*\*\*\*, *p*-value < 0.0001).

<sup>D</sup>D-statistic (maximum deviation between the two distribution curves).

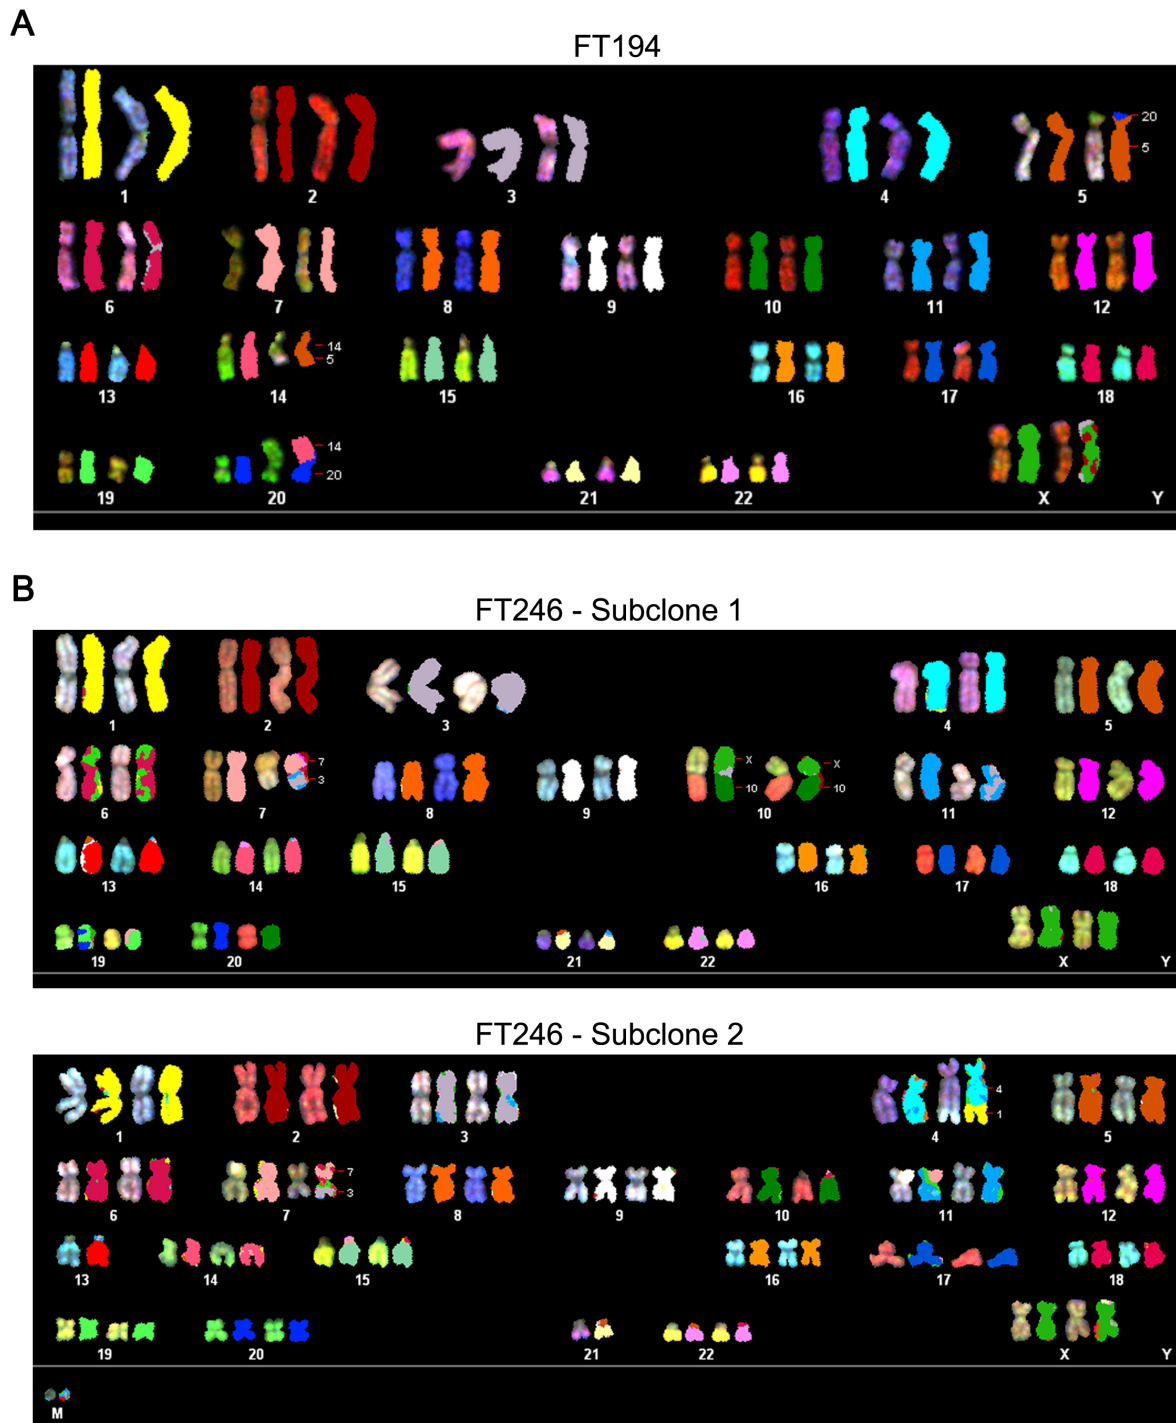

**Figure S1. Spectral Karyotyping of FT194 and FT246 Cells.**

(A) The modal spectral karyotype for FT194 is 46,XX,t(5;14;20)(p1?5;q2?4;p1?3) based on the analysis of 25 karyotypes. (B) Based on the analysis of 25 karyotypes, FT246 harbor two predominant karyotypes 46,XX,der(7)t(3;7),-10,-10,+der(10)t(10;X)x2,del(X)(q?) (subclone 1; top), and 45,XX,der(4)t(1;4),der(7)t(3;7),del(10)(p11.2),-13,-21,+mar (subclone 2; bottom).

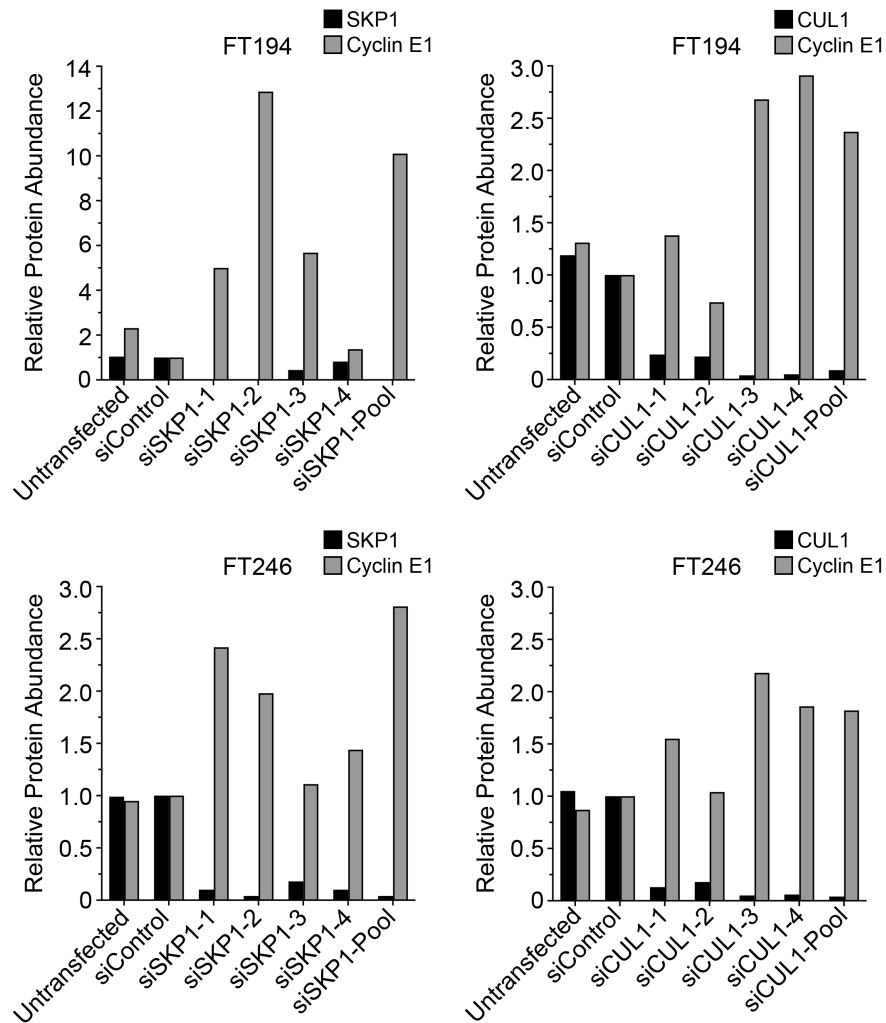

**Figure S2. SKP1 or CUL1 Silencing is Associated with Increases in Cyclin E1 Abundance.** Bar charts of relative protein abundance representing the semi-quantitative western blots depicting the SKP1 or CUL1 silencing efficiency as shown in Figure 2.

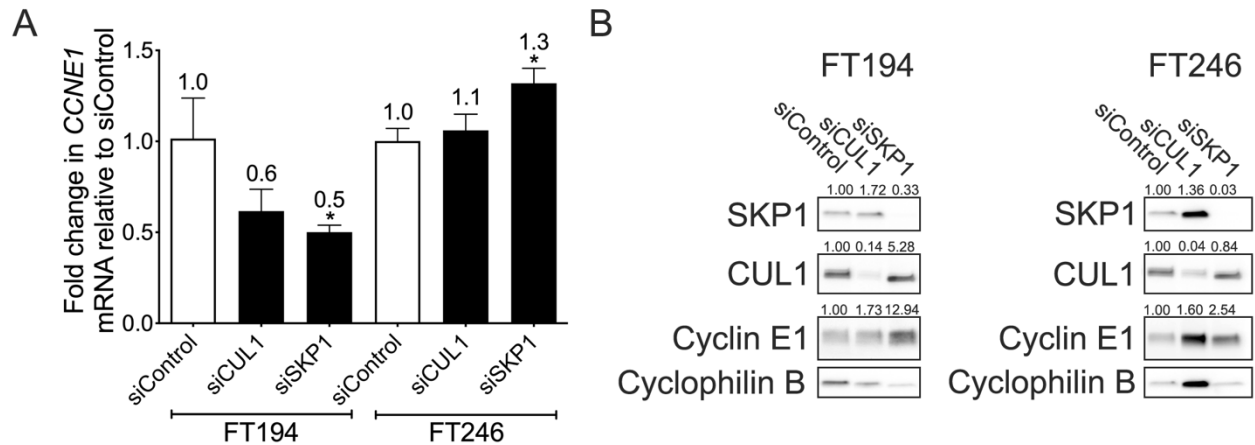

**Figure S3. Evaluation of *CCNE1* transcripts and Cyclin E1 protein after *SKP1* or *CUL1* knockdown.** (A) Mean *CCNE1* RNA expression data from FT194 and FT246 cells after transfection with siControl, siSKP1 or siCUL1. Data are shown as fold change in expression relative to siControl. Bars represent standard deviation from three independently transfect plates. (\*,  $P$ -value < 0.05). (B) Semi-quantitative western blot depicting the silencing efficiencies of individual siRNA treatments with the numerical values indicating residual protein levels. Fold changes in SKP1, CUL1 or Cyclin E1 expression relative to siControl are indicated, using cyclophilin B as a loading control.

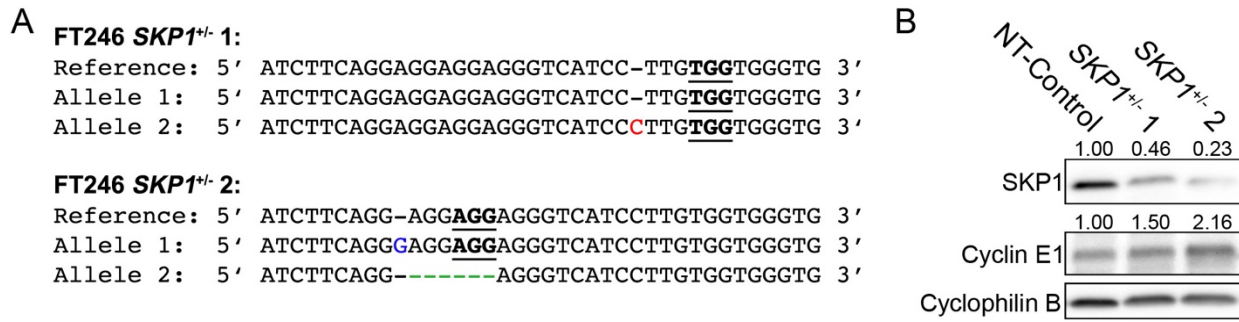

**Figure S4. DNA Sequencing and Western Blots Identify CRISPR/CAS9 Edits of *SKP1*.**

(A) DNA sequencing results for individual *SKP1* alleles showing small indels (colored text) at the expected CRISPR edit site located 3 base pairs (bp) upstream of the NGG recognition sequence (protospacer adjacent motif [PAM]; underlined). *SKP1*<sup>+/-</sup> 1 retains one wild-type allele and harbors a 1 bp (out-of-frame) insertion in the second allele. *SKP1*<sup>+/-</sup> 2 harbors a 1 bp (out-of-frame) insertion in one allele, and a 6 bp (in-frame) deletion in the second allele. (B) Representative semi-quantitative western blots depicting the SKP1 and Cyclin E1 expression in FT246 *SKP1* heterozygous clones (*SKP1*<sup>+/-</sup>1 and *SKP1*<sup>+/-</sup>2). Fold changes in SKP1 or Cyclin E1 expression relative to NT-Control are indicated, using cyclophilin B as a loading control.
